# Supplementary material
Source: PubMed Central journal article supplement (PMC5772935)
Supplement: NIHMS842719-supplement-video_caption.pdf [file NIHMS842719-supplement-video_caption.pdf]

1 **SI Guide**

2 **Supplementary Video 1 | Representative video revealing calcium dynamics of dorsal**  
3 **medial PFC GCaMP6s-expressing neurons.** Injection of AAV-CaMKII-GCaMP6s resulted in  
4 dynamic GCaMP6s fluorescence from hundreds of visible PFC neurons *in vivo* (see methods for  
5 details). Data acquisition occurred at 2.5Hz, and this representative video is shown at 10X  
6 normal speed (25 frames per second; 485 x 508 pixels; 373 $\mu$ m $\beta$  x 390 $\mu$ m).

7
